# Supplementary material for: Exploration of microplastic pollution with particular focus on source identification and spatial patterns in riverine water, sediment and fish of the Swat River, Pakistan
Source: Royal Society of Chemistry journal article supplement (doi:10.1039/d2ra00319h), 2022-01-01
Supplement: d2ra00319h1.pdf [file d2ra00319h1.pdf]

## Supplementary Material

1  
2  
3  
4  
5  
6  
7  
8  
9  
10  
11  
12  
13  
14  
15  
16  
17  
18  
19  
20  
21  
22

### **Exploration of Microplastic Pollution with Particular Focus on Source Identification and Spatial Patterns in Riverine Water, Sediment and Fish of Swat River, Pakistan**

Luqman Khan<sup>1</sup>, Sidra Ghias<sup>1</sup>, Mazhar Iqbal Zafar<sup>1\*</sup>, Aiyeshah Alhodaib<sup>2\*</sup>, Humaria Fatima<sup>3</sup>, Tofeeq Ur-Rehman<sup>3</sup>, Amir Waseem<sup>4</sup>, Haidar Howari<sup>5</sup>

#### **Affiliations and addresses of the authors**

<sup>1</sup>Department of Environmental Sciences, Faculty of Biological Sciences, Quaid-i-Azam University, Islamabad 45320, Pakistan

<sup>2</sup>Department of Physics, College of Science, Qassim University, Buraydah 51452, Saudi Arabia

<sup>3</sup>Department of Pharmacy, Faculty of Biological Sciences, Quaid-i-Azam University, Islamabad, 45320, Pakistan

<sup>4</sup>Department of Chemistry, Quaid-i-Azam University, Islamabad 45320, Pakistan

<sup>5</sup>Department of Physics, Deanship of Educational Services, Qassim University, Buraydah 51452, Saudi Arabia

**Mr. Luqman Khan** Email: [luqmanenviron@gmail.com](mailto:luqmanenviron@gmail.com)

**Ms. Sidra Ghias (PhD Scholar)** Email: [sidraaghias@gmail.com](mailto:sidraaghias@gmail.com)

**Dr. Mazhar Iqbal Zafar** Email: [mzafar@qau.edu.pk](mailto:mzafar@qau.edu.pk)

**Prof. Dr. Aiyeshah Alhodaib** Email: [ahdieb@qu.edu.sa](mailto:ahdieb@qu.edu.sa)

**Dr. Humaria Fatima** Email: [hfchughtai@qau.edu.pk](mailto:hfchughtai@qau.edu.pk)

**Dr. Tofeeq Ur-Rehman** Email: [tofeeq.urrehman@qau.edu.pk](mailto:tofeeq.urrehman@qau.edu.pk)

**Prof. Dr. Amir Waseem** Email: [amir@qau.edu.pk](mailto:amir@qau.edu.pk)

**Dr. Haidar Howari** Email: [Haidarh1@yahoo.com](mailto:Haidarh1@yahoo.com)

23 \* **Corresponding author(s):**

24 **1- Dr. Mazhar Iqbal Zafar\*** (Ph.D; Wageningen University, Netherlands)

25 Department of Environmental Sciences, Faculty of Biological Sciences,

26 Quaid-i-Azam University, Islamabad 45320, Pakistan.

27 **Tel:** +92-51-90644182

28 **E-mail:** [mzafar@qau.edu.pk](mailto:mzafar@qau.edu.pk)

29 **ORCID:** Mazhar Iqbal Zafar ([0000-0001-7660-9283](https://orcid.org/0000-0001-7660-9283))

30 **2- Dr. Aiyeshah Alhodaib\***

31 Department of Physics, College of Science,

32 Qassim University, Buraydah 51452, Saudi Arabia

33 **E-mail:** [ahdieb@qu.edu.sa](mailto:ahdieb@qu.edu.sa)

34

35

36

37

38

39

40

41

42

## Contents

44 **Table SI 1:** Survey of sampling stations for MPs source identification. Serial No. 1-10 represents sampling stations as 10 sampling  
 45 stations were selected in the present study.

| Sr. No. | Nearest centers to the river (Domestic or commercial) | Any developmental activity behind the site | Any industrial area near the site | Any industrial discharge near the site | Tourist Spot |
|---------|-------------------------------------------------------|--------------------------------------------|-----------------------------------|----------------------------------------|--------------|
| 1       | Yes                                                   | No                                         | No                                | No                                     | Yes          |
| 2       | No                                                    | No                                         | No                                | No                                     | No           |
| 3       | Yes                                                   | No                                         | No                                | No                                     | Yes          |
| 4       | Yes                                                   | No                                         | No                                | No                                     | Yes          |
| 5       | No                                                    | No                                         | No                                | No                                     | Yes          |
| 6       | Yes                                                   | No                                         | Yes                               | Yes                                    | No           |
| 7       | Yes                                                   | No                                         | Yes                               | Yes                                    | Yes          |
| 8       | No                                                    | No                                         | No                                | No                                     | No           |
| 9       | Yes                                                   | No                                         | Yes                               | Yes                                    | Yes          |
| 10      | Yes                                                   | No                                         | No                                | No                                     | Yes          |

46 **Table SI 2:** Microplastics abundance (numeric and percent), size fractions and shapes in urban and non-urban sediments of Swat River.

47 Unit used is items/kg. S1 and S2 are two size fractions of MPs measured in present study.

| Station Zone     | Station name along with code | Numeric abundance | Abundance (%) | S1<br>0.5-1 mm | S2<br>1-5 mm  | Fiber        | Film        | Fragment      | Foam | Pellet       |
|------------------|------------------------------|-------------------|---------------|----------------|---------------|--------------|-------------|---------------|------|--------------|
| <b>Non-Urban</b> | Kalam (B1)                   | 11/51             | 21.7          | 6/11 (54.5%)   | 5/11 (45.4%)  | 3/9 (33.3%)  | 2/3 (66.7%) | 4/31 (12.9%)  | 0/0  | 2/8 (25%)    |
|                  | Mankial (B2)                 | 10/51             | 19.6          | 9/10 (90%)     | 1/10 (10%)    | 0/9 (0)      | 0/3 (0)     | 10/31 (32.2%) | 0/0  | 0/8 (0)      |
|                  | Bahrain (B3)                 | 10/51             | 19.6          | 9/10 (90%)     | 1/10 (10%)    | 2/9 (22.2%)  | 0/3 (0)     | 6/31 (19.3%)  | 0/0  | 2/8 (25%)    |
|                  | Madyan (B4)                  | 12/51             | 23.5          | 11/12 (91.7%)  | 1/12 (8.33%)  | 2/9 (22.2%)  | 0/3 (0)     | 7/31 (25.6%)  | 0/0  | 3/8 (37.5%)  |
|                  | Baghderai (B5)               | 8/51              | 15.7          | 7/8 (87.5%)    | 1/8 (12.5%)   | 2/9 (22.2%)  | 1/3 (33.3%) | 4/31 (12.9%)  | 0/0  | 1/8 (12.5%)  |
| <b>Urban</b>     | Matta (A1)                   | 26/131            | 19.8          | 16/26 (61.5%)  | 10/26 (38.5%) | 5/28 (17.8%) | 2/5 (40%)   | 14/76 (18.4%) | 0/0  | 5/22 (22.7%) |
|                  | Kanju (A2)                   | 26/131            | 19.8          | 22/26 (84.6%)  | 4/26 (15.4%)  | 3/28 (10.7%) | 1/5 (20%)   | 18/76 (23.7%) | 0/0  | 4/22 (18.2%) |
|                  | Hazara (A3)                  | 26/131            | 19.8          | 23/26 88.5%    | 3/26 11.5%    | 8/28 (28.6%) | 0/5         | 13/76 (17.1%) | 0/0  | 5/22 (22.7%) |
|                  | Gugdara (A4)                 | 34/131            | 25.9          | 28/34 (82.3%)  | 6/34 (17.6%)  | 6/28 (21.4%) | 0/5         | 22/76 (28.9%) | 0/0  | 6/22 (27.3%) |
|                  | Chakdara (A5)                | 19/131            | 14.5          | 15/19          | 4/19 (21%)    | 6/28         | 2/5         | 9/76 (11.8%)  | 0/0  | 2/22         |

|  |  |  |  |         |  |         |       |  |  |         |
|--|--|--|--|---------|--|---------|-------|--|--|---------|
|  |  |  |  | (78.4%) |  | (21.4%) | (40%) |  |  | (9.09%) |
|--|--|--|--|---------|--|---------|-------|--|--|---------|

48

49 **Table SI 3:** MPs abundance (numeric and percent) size fractions and shapes in urban and non-urban water samples of SR. Unit used is  
50 items/L. S1 and S2 are two size fractions of MPs measured in present study.

| Station Zone | station name along with code | Numeric abundance | Abundance (%age) | S1<br>0.5-1 mm | S2<br>1-5 mm | Fiber         | Film        | Fragment      | Foam     | Pellet       |
|--------------|------------------------------|-------------------|------------------|----------------|--------------|---------------|-------------|---------------|----------|--------------|
| Non-Urban    | Kalam (B1)                   | 13/60             | 21.7             | 10/13 (76.9%)  | 3/13 (23.1%) | 5/10 (50%)    | 1/6 (16.7%) | 6/29 (20.7%)  | 0/0      | 1/15 (6.66%) |
|              | Mankial (B2)                 | 9/60              | 15               | 8/9 (88.9%)    | 1/9 (11.1%)  | 1/10 (10%)    | 1/6 (16.7%) | 3/29 (10.3%)  | 0/0      | 4/15 (26.7%) |
|              | Bahrain (B3)                 | 13/60             | 21.7             | 10/13 (76.9%)  | 3/13 (23.1%) | 0/10 (0)      | 0/6 (0)     | 9/29 (31%)    | 0/0      | 4/15 (26.7%) |
|              | Madyan (B4)                  | 14/60             | 23.3             | 12/14 (85.7%)  | 2/14 (14.3%) | 2/10 (20%)    | 2/6 (33.3%) | 4/6 (66.7%)   | 0/0      | 6/15 (40%)   |
|              | Baghderai (B5)               | 11/60             | 18.3             | 6/11 (54.5%)   | 5/11 (45.4%) | 2/10 (20%)    | 2/6 (33.3%) | 7/29 (24.1%)  | 0/0      | 0/15 (0)     |
| Urban        | Matta (A1)                   | 29/132            | 22               | 22/29 (75.9%)  | 7/29 (24.1%) | 9/39 (23.1%)  | 1/7 (14.3%) | 12/63 (19%)   | 0/3 (0%) | 7/20 (35%)   |
|              | Kanju (A2)                   | 34/132            | 25.7             | 25/34 (73.5%)  | 9/34 (26.5%) | 17/39 (43.6%) | 2/7 (28.6%) | 12/63 (19%)   | 0/3 (0%) | 3/20 (15%)   |
|              | Hazara (A3)                  | 13/132            | 9.84             | 9/13 (69.2%)   | 4/13 (30.8%) | 2/39 (5.12%)  | 0/7 (0%)    | 11/63 (17.5%) | 0/3 (0%) | 0/20 (0%)    |

|  |               |        |      |               |               |              |             |               |            |            |
|--|---------------|--------|------|---------------|---------------|--------------|-------------|---------------|------------|------------|
|  | Gugdara (A4)  | 39/132 | 29.5 | 24/39 (61.5%) | 15/39 (38.5%) | 9/39 (23.1%) | 3/7 (42.8%) | 17/63 (27%)   | 3/3 (100%) | 7/20 (35%) |
|  | Chakdara (A5) | 17/132 | 12.9 | 16/17 (94.1%) | 1/17 (5.88%)  | 2/39 (5.12%) | 1/7 (14.3%) | 11/63 (17.5%) | 0/3 (0%)   | 3/20 (15%) |

51

52 **Table SI 4:** MPs abundance (numeric and percent), size fractions and shapes in urban and non-urban fish samples (*Shizothorax*  
53 *plagiostomus*) of SR. A1-A5 showed urban sites while B1-B5 demonstrated non-urban sampling stations. Unit used is items/kg. S1 and  
54 S2 are two size fractions of MPs measured in present study.

| Station Zone | Station Name with Code | Numeric abundance (items/fish) | abundance (%) | S1 0.5-1 mm   | S2 1-5 mm    | Fiber         | Film       | Fragment     | Foam | Pellet       |
|--------------|------------------------|--------------------------------|---------------|---------------|--------------|---------------|------------|--------------|------|--------------|
| Non-Urban    | Kalam (B1)             | 14/67                          | 21            | 12/14 (85.7%) | 2/14 (14.3%) | 4/24 (16.7%)  | 2/2 (100%) | 8/37 (21.6%) | 0/0  | 0/4 (0)      |
|              | Mankial (B2)           | 15/67                          | 22.4          | 14/15 (93.3%) | 1/15 (6.7%)  | 5/24 (20.8%)  | 0/2 (0)    | 10/37 (27%)  | 0/0  | 0/4 (0)      |
|              | Bahrain (B3)           | 13/67                          | 19.4          | 11/13 (84.6%) | 2/13 (15.4%) | 5/24 (20.8%)  | 0/2 (0)    | 6/37 (16.2%) | 0/0  | 2/4 (50%)    |
|              | Madyan (B4)            | 10/67                          | 14.9          | 10/10 (100%)  | 0/10 (0%)    | 2/24 (8.33%)  | 0/2 (0)    | 7/37 (18.9%) | 0/0  | ¼ (25%)      |
|              | Baghderai (B5)         | 15/67                          | 22.4          | 15/15 (100%)  | 0/15 (0%)    | 8/24 (33.3%)  | 0/2 (0)    | 6/37 (16.2%) | 0/0  | ¼ (25%)      |
|              | Matta (A1)             | 26/86                          | 30.2          | 21/26 (80.8%) | 5/26 (19.2%) | 13/40 (32.5%) | 0/3 (0)    | 4/21 (19%)   | 0/0  | 9/22 (40.9%) |
|              | Kanju (A2)             | 20/86                          | 23.2          | 17/20         | 3/20         | 12/40 (30%)   | 0/3 (0)    | 4/21 (19%)   | 0/0  | 4/22         |

|       |               |       |      |                  |                 |             |               |              |     |                 |
|-------|---------------|-------|------|------------------|-----------------|-------------|---------------|--------------|-----|-----------------|
| Urban |               |       |      | (85%)            | (15%)           |             |               |              |     | (18.2%)         |
|       | Hazara (A3)   | 16/86 | 18.6 | 11/16<br>(68.7%) | 5/16<br>(31.2%) | 8/40 (20%)  | 3/3<br>(100%) | 2/21 (9.52%) | 0/0 | 3/22<br>(13.6%) |
|       | Gugdara (A4)  | 8/86  | 9.3  | 7/8<br>(87.5%)   | 1/8<br>(12.5%)  | 4/40 (10%)  | 0/3 (0)       | 3/21 (14.3%) | 0/0 | 1/22<br>(4.54%) |
|       | Chakdara (A5) | 16/86 | 18.6 | 14/16<br>(87.5%) | 2/16<br>(12.5%) | 3/40 (7.5%) | 0/3 (0)       | 8/21 (38.1%) | 0/0 | 5/22<br>(22.7%) |

55

56 **Table SI 5:** Field parameters of fish samples collected along Swat River. Data is presented as mean body length and weight (n=4).

| Station Name | Station Code | GPS Coordinates           | Number of S. Plagiostomus (n) | Fish Average Length (cm) | Fish Average Weight (g) | Sampling date |
|--------------|--------------|---------------------------|-------------------------------|--------------------------|-------------------------|---------------|
| Kalam        | B1           | 35°28'51'N<br>72°35'29' E | 4                             | 16.6                     | 41.4                    | 28/03/2019    |
| Mankial      | B2           | 35°19'35'N<br>72°36'42' E | 4                             | 16.5                     | 41                      | 28/03/2019    |
| Bahrain      | B3           | 35°12'15'N<br>72°32'49' E | 4                             | 16.8                     | 41.7                    | 29/03/2019    |
| Madyan       | B4           | 35°08'40'N<br>72°32'17' E | 4                             | 16.4                     | 36.8                    | 29/03/2019    |
| Baghderai    | B5           | 35°03'14'N<br>72°28'28' E | 4                             | 18.8                     | 58.7                    | 01/04/2019    |
| Matta        | A1           | 34°53'50'N<br>72°25'44' E | 4                             | 17.5                     | 43.4                    | 02/04/2019    |

|          |    |                           |   |      |      |            |
|----------|----|---------------------------|---|------|------|------------|
| Kanju    | A2 | 34°47'34"N<br>72°20'47' E | 4 | 16.4 | 36.8 | 04/04/2019 |
| Hazara   | A3 | 34°47'27"N<br>72°18'09' E | 4 | 17.8 | 48.3 | 06/04/2019 |
| Gugdara  | A4 | 34°44'47"N<br>72°16'19' E | 4 | 17.2 | 38.8 | 06/04/2019 |
| Chakdara | A5 | 34°38'48"N<br>72°01'58' E | 4 | 15.9 | 34.9 | 09/09/2019 |

57

58 **Table SI 6:** MPs abundance (numeric and percent), size fractions and shapes in urban and non-urban sediment tributaries samples. Tr1-  
59 Tr4 and Tr5-Tr7 represent the non-urban and urban tributaries respectively.

| Station Zone | Station Name along with Code | Numeric abundance (items/kg) | Abundance (%) | S1<br>0.5-1 mm   | S2<br>1-5 mm    | Fiber           | Film        | Fragment       | Foam | Pellet        |
|--------------|------------------------------|------------------------------|---------------|------------------|-----------------|-----------------|-------------|----------------|------|---------------|
| Non-Urban    | Kalam (Tr1)                  | 24/69                        | 34.8%         | (100%)           | 0               | 4/15<br>(26.7%) | 1/3 (33.3%) | 15/25<br>(60%) | 0/0  | 4/26 (15.4%)  |
|              | Mankial (Tr2)                | 16/69                        | 23.2%         | 15/16<br>(93.7%) | 1/16<br>(6.25%) | 1/15<br>(6.66%) | 1/3 (33.3%) | 4/25 (16%)     | 0/0  | 10/26 (38.5%) |
|              | Bahrain (Tr3)                | 16/69                        | 23.2%         | 15/16<br>(93.7%) | 1/16<br>(6.25%) | 9/15 (60%)      | 1/3 (33.3%) | 3/25 (12%)     | 0/0  | 3/26 (11.5%)  |
|              | Madyan (Tr4)                 | 13/69                        | 18.8%         | 12/13<br>(92.3%) | 1/13<br>(7.69%) | 1/15<br>(6.66%) | 0/3 (0)     | 3/25 (12%)     | 0/0  | 9/26 (34.6%)  |



|       |              |        |       |                  |                 |                  |            |                  |               |               |
|-------|--------------|--------|-------|------------------|-----------------|------------------|------------|------------------|---------------|---------------|
| Urban | Matta (Tr5)  | 46/133 | 34.6% | 42/46<br>(91.3%) | 4/46<br>(8.7%)  | 5/19<br>(26.3%)  | 0/4 (0)    | 23/65<br>(35.4%) | 0/1 (0)       | 18/44 (40.9%) |
|       | Kanju (Tr6)  | 21/133 | 15.8% | 20/21<br>95.2%   | 1/21<br>(4.8%)  | 1/19<br>(5.26%)  | 0/4 (0)    | 10/65<br>(15.4%) | 0/1 (0)       | 10/44 (22.7%) |
|       | Hazara (Tr7) | 66/133 | 49.6% | 65/66<br>(98.5%) | 1/66<br>(1.51%) | 13/19<br>(68.4%) | 4/4 (100%) | 32/65<br>(49.2%) | 1/1<br>(100%) | 16/44 (36.4%) |

61 **Table SI 7:** MPs abundance (numeric and percent), size fractions and shapes in urban and non-urban tributaries water samples. Tr1-Tr4  
 62 and Tr5-Tr7 represent the non-urban and urban tributaries respectively.

| Station Zone | Station Name along with Code | Numeric abundance (items/L) | abundance (%) | S1<br>0.5-1 mm   | S2<br>1-5 mm    | Fiber           | Film        | Fragment        | Foam        | Pellet       |
|--------------|------------------------------|-----------------------------|---------------|------------------|-----------------|-----------------|-------------|-----------------|-------------|--------------|
| Non-Urban    | Kalam (Tr1)                  | 14/46                       | 30.4          | 10/14<br>(71.4%) | 4/14<br>(28.6%) | 2/8<br>(25%)    | 2/6 (33.3%) | 6/15<br>(40%)   | 1/3 (33.3%) | 3/14 (92.8%) |
|              | Mankial (Tr2)                | 12/46                       | 26.1          | 12/12<br>(100%)  | 0               | 1/8<br>(12.5%)  | 2/6 (33.3%) | 4/15<br>(26.7%) | 1/3 (33.3%) | 4/14 (28.6%) |
|              | Bahrain (Tr3)                | 13/46                       | 28.3          | 10/13<br>(76.9%) | 3/13<br>(23.1)  | 4/8<br>(50%)    | 1/6 (16.7%) | 3/15<br>(20%)   | 1/3 (33.3%) | 4/14 (28.6%) |
|              | Madyan (Tr4)                 | 7/46                        | 15.2          | 6/7<br>(85.7%)   | 1/7<br>(14.3%)  | 1/8<br>(12.5%)  | 1/6 (16.7%) | 2/15<br>(13.3%) | 0/3 (0)     | 3/14 (92.8%) |
| Urban        | Matta (Tr5)                  | 19/46                       | 41.3          | 19/19<br>(100%)  | 0               | 4/12<br>(33.3%) | 1/7 (14.3%) | 5/10<br>(50%)   | 4/7 (57.1%) | 5/10 (50%)   |
|              | Hazara (Tr6)                 | 12/46                       | 26.1          | 12/12<br>(100%)  | 0               | 4/12<br>(33.3%) | 3/7 (42.8%) | 2/10<br>(20%)   | 1/7 (14.3%) | 2/10 (20%)   |
|              | Gugdara (Tr7)                | 15/46                       | 32.6          | 11/15<br>(73.3%) | 4/15<br>(26.7%) | 4/12<br>(33.3%) | 3/7 (42.8%) | 3/10<br>(30%)   | 2/7 (28.6%) | 3/10 (30%)   |

63

64

65 **Table SI 8:** Mass abundance of MPs in urban and non-urban water (mg/L) samples collected along the Swat River. A1-A5 are urban  
 66 stations while B1-B5 are non-urban. Data is presented as average of replicates (n=3). X1 is filter mass before filtration while X2 after  
 67 filtration (filter mass + MPs mass).

| Matrix | Station Zone | Station name with Code | Filter Mass (X1) | Filter Mass with MPs (X2) | Mass abundance (mg) | Mean ± SD |
|--------|--------------|------------------------|------------------|---------------------------|---------------------|-----------|
| Water  | Non-Urban    | Kalam (B1)             | 256              | 257                       | 0.9                 | 0.3±0.1   |
|        |              | Mankial (B2)           | 258              | 258                       | 0.7                 | 0.23±0.02 |
|        |              | Bahrain (B3)           | 253              | 253                       | 0.7                 | 0.23±0.02 |
|        |              | Madyan (B4)            | 255              | 255                       | 0.9                 | 0.3±0.02  |
|        |              | Baghderai (B5)         | 253              | 253                       | 0.8                 | 0.26±0.04 |
|        | Urban        | Matta (A1)             | 254              | 256                       | 2.7                 | 0.9±0.4   |
|        |              | Kanju (A2)             | 253              | 256                       | 3.2                 | 1.06±0.01 |
|        |              | Hazara (A3)            | 265              | 265                       | 0.9                 | 0.3±0.1   |
|        |              | Gugdara (A4)           | 263              | 267                       | 3.8                 | 1.26±0.01 |
|        |              | Chakdara (A5)          | 268              | 269                       | 1.1                 | 0.36±0.01 |

68

69 **Table SI 9:** Mass abundance of MPs in urban and non-urban sediment (mg/kg) samples collected along the Swat River. A1-A5 are  
 70 urban stations while B1-B5 are non-urban. Data is presented as average of replicates (n=3). X1 is filter mass before filtration while X2  
 71 after filtration (filter mass + MPs mass).

| Matrix | Station Zone | Station name with Code | Filter mass (X1) | Filter mass with MPs (X2) | Mass abundance (mg) (X2-X1) | Mean ± SD |
|--------|--------------|------------------------|------------------|---------------------------|-----------------------------|-----------|
|        |              | Kalam (B1)             | 254              | 255                       | 1.1                         | 0.36±0.01 |

|                 |           |                |       |       |     |           |
|-----------------|-----------|----------------|-------|-------|-----|-----------|
| <b>Sediment</b> | Non-Urban | Mankial (B2)   | 255   | 256   | 0.7 | 0.23±0.02 |
|                 |           | Bahrain (B3)   | 256   | 257   | 0.8 | 0.26±0.04 |
|                 |           | Madyan (B4)    | 261   | 262   | 1.1 | 0.36±0.01 |
|                 |           | Baghderai (B5) | 258   | 258   | 0.6 | 0.2±0.1   |
|                 | Urban     | Matta (A1)     | 259   | 261   | 1.7 | 0.56±0.02 |
|                 |           | Kanju (A2)     | 258   | 259.9 | 1.9 | 0.63±0/03 |
|                 |           | Hazara (A3)    | 256.8 | 258.1 | 1.3 | 0.43±0.03 |
|                 |           | Gugdara (A4)   | 256.3 | 258.8 | 2.5 | 0.83±0.03 |
|                 |           | Chakdara (A5)  | 255.1 | 256.3 | 1.2 | 0.4±0.03  |

72

73 **Table SI 10:** Mass abundance of MPs in urban and non-urban fish (mg/fish) samples collected along the Swat River. A1-A5 denotes  
74 the urban stations while B1-B5 represent the non-urban stations. Data is presented as average of replicates (n=4). X1 is filter mass before  
75 filtration while X2 after filtration (filter mass + MPs mass).

| <b>Matrix</b> | <b>Station Zone</b> | <b>Station name with Code</b> | <b>Filter mass (X1)</b> | <b>Filter mass with MPs (X2)</b> | <b>Mass abundance (mg)</b> | <b>Mean ± SD</b> |
|---------------|---------------------|-------------------------------|-------------------------|----------------------------------|----------------------------|------------------|
| <b>Fish</b>   | Non-Urban           | Kalam (B1)                    | 254                     | 255                              | 1.2                        | 0.3±0.16         |
|               |                     | Mankial (B2)                  | 254                     | 251                              | 1.1                        | 0.27±0.02        |
|               |                     | Bahrain (B3)                  | 253                     | 254                              | 0.9                        | 0.22±0.008       |
|               |                     | Madyan (B4)                   | 257                     | 258                              | 0.6                        | 0.15±0.01        |
|               |                     | Baghderai (B5)                | 256                     | 257                              | 0.9                        | 0.22±0.008       |
|               |                     | Matta (A1)                    | 251                     | 253                              | 1.9                        | 0.47±0.01        |

|  |       |               |     |     |     |           |
|--|-------|---------------|-----|-----|-----|-----------|
|  | Urban | Kanju (A2)    | 256 | 257 | 1.3 | 0.32±0.01 |
|  |       | Hazara (A3)   | 254 | 255 | 0.7 | 0.17±0.02 |
|  |       | Gugdara (A4)  | 253 | 251 | 0.6 | 0.15±0.01 |
|  |       | Chakdara (A5) | 254 | 255 | 0.7 | 0.17±0.02 |

76

77 **Table SI 11:** Mass abundance of MPs in urban and non-urban water (mg/L) samples collected along the tributaries. . Tr1-Tr4 and Tr5-  
78 Tr7 represent the non-urban and urban tributaries respectively. Data is presented as average of replicates (n=3). X1 is filter mass before  
79 filtration while X2 after filtration (filter mass + MPs mass).

| Matrix | Station Zone | Station name along with Code | Filter mass (X1) | Filter mass with MPs (X2) | Mass abundance (mg) | Mean ± SD |
|--------|--------------|------------------------------|------------------|---------------------------|---------------------|-----------|
| Water  | Urban        | Matta (Tr5)                  | 255              | 255                       | 0.8                 | 0.26±0.04 |
|        |              | Hazara (Tr6)                 | 254              | 255                       | 0.8                 | 0.26±0.04 |
|        |              | Gugdara (Tr7)                | 252              | 253                       | 0.9                 | 0.3±0.02  |
|        | Non-Urban    | Kalam (Tr1)                  | 254              | 255                       | 1                   | 0.33±0.03 |
|        |              | Mankial (Tr2)                | 255              | 256                       | 0.9                 | 0.3±0.02  |
|        |              | Bahrain (Tr3)                | 256              | 257                       | 1.1                 | 0.36±0.01 |
|        |              | Madyan (Tr4)                 | 254              | 255                       | 0.6                 | 0.2±0.1   |

80

81

82 **Table SI 12:** Mass abundance of MPs in urban and non-urban sediment (mg/kg) samples collected along tributaries. Tr1-Tr4 and Tr5-  
 83 Tr7 represent the non-urban and urban tributaries respectively. Data is presented as average of replicates (n=3). X1 is filter mass before  
 84 filtration while X2 after filtration (filter mass + MPs mass).

| <b>Matrix</b>   | <b>Station zone</b> | <b>Station name with Code</b> | <b>Filter mass (X1)</b> | <b>Filter mass with MPs (X2)</b> | <b>Mass abundance (mg)</b> | <b>Mean + SD</b> |
|-----------------|---------------------|-------------------------------|-------------------------|----------------------------------|----------------------------|------------------|
| <b>Sediment</b> | Urban               | Matta (Tr5)                   | 254                     | 258                              | 3.7                        | 1.23±0.03        |
|                 |                     | Hazara (Tr6)                  | 256                     | 257                              | 1.4                        | 0.46±0.04        |
|                 |                     | Gugdara (Tr7)                 | 255                     | 260                              | 4.5                        | 1.5±0.3          |
|                 | Non-Urban           | Kalam (Tr1)                   | 260                     | 262                              | 1.7                        | 0.56±0.02        |
|                 |                     | Mankial (Tr2)                 | 258                     | 259                              | 1.1                        | 0.36±0.01        |
|                 |                     | Bahrain (Tr3)                 | 254                     | 255                              | 1.1                        | 0.36±0.01        |
|                 |                     | Madyan (Tr4)                  | 255                     | 256                              | 0.9                        | 0.3±0.02         |

86 **Table SI 13:** Comparison of the reference peaks with the identified functional groups of all polymers found (PE, PP, PS, PVC and PET)  
 87 in environmental samples (River Sediment, River Water, Tributaries Sediment, Tributaries Water).

| Polypropylene (PP)                         |                               |                               |                              |                          |          |                                    |                                  |
|--------------------------------------------|-------------------------------|-------------------------------|------------------------------|--------------------------|----------|------------------------------------|----------------------------------|
| Functional Group                           | C-H3<br>Asymmetric<br>stretch | C-H2<br>Asymmetric<br>stretch | C-H2<br>symmetric<br>stretch | CH2<br>symmetric<br>bend | CH3 bend | C-H bend, CH3<br>rock, C-C stretch |                                  |
| Frequency                                  | 2950                          | 2915                          | 2839                         | 1455                     | 1377     | 1166                               |                                  |
| Identified Peaks in<br>Sediments           | 2950.12                       | 2916.07                       | 2836.13                      | 1451.56                  | 1375.47  | ND                                 |                                  |
| Identified Peaks in water                  | 2949.56                       | 2916.74                       | 2837.30                      | 1456.75                  | 1375.41  | ND                                 |                                  |
| Identified peaks in<br>tributary water     | 2949.41                       | 2917.36                       | 3837.68                      | 1452.42                  | 1375.35  | 1166.85                            |                                  |
| Identified Peaks in tributary<br>sediments | ND                            | 2916.19                       | 2848.07                      | 1470.77                  | 1366.01  | ND                                 |                                  |
| Polystyrene (PS)                           |                               |                               |                              |                          |          |                                    |                                  |
| Functional Group                           | Aromatic C-<br>H stretch      | C-H stretch                   | Aromatic<br>ring stretch     | Aromatic ring<br>stretch | CH2 bend | Aromatic CH bend                   | Aromatic CH out<br>of plane bend |
| Frequency                                  | 3024                          | 2847                          | 1601                         | 1492                     | 1451     | 1027                               | 694                              |
| Identified Peaks in<br>Sediments           | 3024.84                       | 2849.18                       | 1601.19                      | 1492.53                  | 1451.93  | 1025.80                            | 696.85                           |
| Identified Peaks in water                  | 3025.87                       | 2848.07                       | 1588.59                      | 1502.85                  | ND       | 1014.72                            | 3025.87                          |
| Identified peaks in                        | ND                            | 2848.02                       | ND                           | 1503.10                  | ND       | 1016.18                            | ND                               |

|                                         |             |             |             |                               |          |              |         |
|-----------------------------------------|-------------|-------------|-------------|-------------------------------|----------|--------------|---------|
| tributary water                         |             |             |             |                               |          |              |         |
| Identified Peaks in tributary sediments | 3025.87     | 2848.07     | 1588.59     | 1502.85                       | ND       | 1014.72      | 3025.87 |
| Polyvinyl Chloride (PVC)                |             |             |             |                               |          |              |         |
| Functional Group                        | CH2 bend    | CH bend     | CH bend     | C-C stretch                   | CH2 rock | C-Cl stretch |         |
| Frequency                               | 1427        | 1331        | 1255        | 1099                          | 966      | 616          |         |
| Identified Peaks in Sediments           | ND          | 1326.90     | 1248.92     | 1075.25                       | ND       | 612.17       |         |
| Identified Peaks in water               | 1339.56     | ND          | 1092.18     | 968.36                        | 608.62   | 1339.56      |         |
| Identified peaks in tributary water     | ND          | 1340.31     | ND          | 1092.31                       | 969.03   | 630.49       |         |
| Identified Peaks in tributary sediments | 1421        | ND          | 1243.60     | 1087.48                       | ND       | 611.02       |         |
| Polyethylene Terephthalate (PET)        |             |             |             |                               |          |              |         |
| Functional Group                        | C=O stretch | C-O stretch | C-O stretch | Aromatic CH out of plane bend | -        | -            |         |
| Frequency                               | 1713        | 1241        | 1094        | 720                           | -        | -            |         |
| Identified Peaks in Sediments           | 1713.37     | 1240.31     | 1091.92     | 721.34                        | -        | -            |         |
| Identified Peaks in water               | 1713.01     | 1239.91     | 1092.24     | 721.84                        | -        | -            |         |
| Identified peaks in                     | 1712.24     | 1238.73     | 1086.43     | 722                           | -        | -            |         |



|                                         |             |             |                      |                      |                      |                      |
|-----------------------------------------|-------------|-------------|----------------------|----------------------|----------------------|----------------------|
| tributary water                         |             |             |                      |                      |                      |                      |
| Identified Peaks in tributary sediments | 1713.01     | 1239.91     | 1092.24              | 721.84               | -                    | -                    |
| Polyethylene (PE)                       |             |             |                      |                      |                      |                      |
| Functional Group                        | C-H stretch | C-H stretch | CH <sub>2</sub> bend | CH <sub>2</sub> bend | CH <sub>2</sub> rock | CH <sub>2</sub> rock |
| Frequency                               | 2915        | 2845        | 1472                 | 1462                 | 717                  | 730                  |
| Identified Peaks in Sediments           | 2914.94     | 2847.75     | 1470.64              | 1462.41              | 717.89               | 729.41               |
| Identified Peaks in water               | 2914.30     | 2847.64     | 1471                 | 1463.01              | 717.53               | 729.49               |
| Identified peaks in tributary water     | 2915.11     | 2847.64     | 1469.55              | ND                   | 721.97               | ND                   |
| Identified Peaks in tributary sediments | 2916.72     | 2849.16     | 1469.37              | 1452.88              | 721.05               | ND                   |

89

90

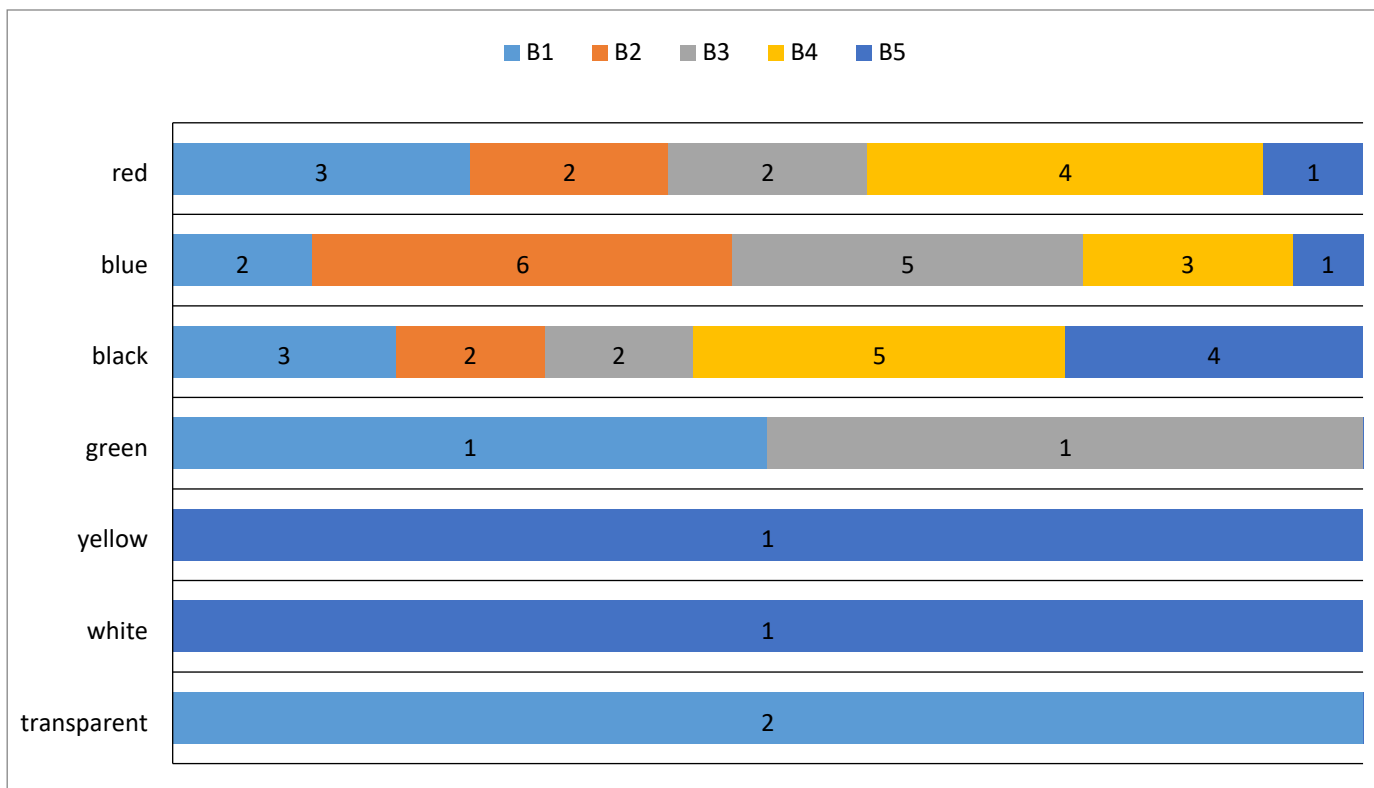

91

92 Figure SI 1: Ratio of MPs colors found in non-urban sediment samples collected from SR. Data is plotted as numeric abundance of  
93 colors against non-urban stations. The denotations B1, B2, B3, B4 and B5 represents Kalam, Mankial, Bahrain, Madyan and  
94 Baghderai sampling stations respectively. Numbers 1, 2, 3 etc. in main graph is numeric abundance of colored MPs items observed  
95 on optical microscopy.

96

97

98

99

100

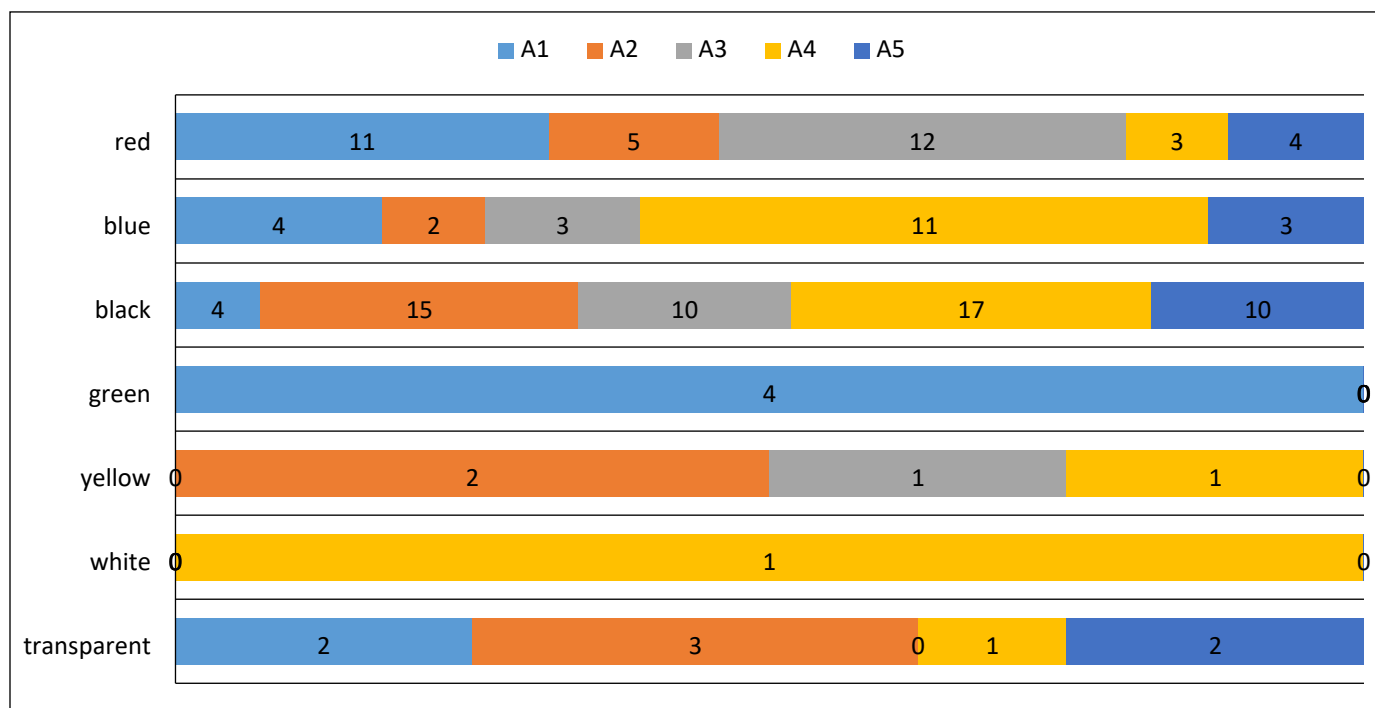

101

102

103 Figure SI 2: Ratio of MPs colors found in Urban Sediment stations (A1-A5). Data is plotted as numeric abundance of colors against  
104 urban stations against Non-Urban stations. The denotations A1, A2, A3, A4 and A5 represents sampling stations Matta , Kanju ,  
105 Hazara, Gugdara and Chakdara respectively. Numbers 1, 2, 3 etc. in main graph is numeric abundance of colored MPs items  
106 observed on optical microscopy.

107

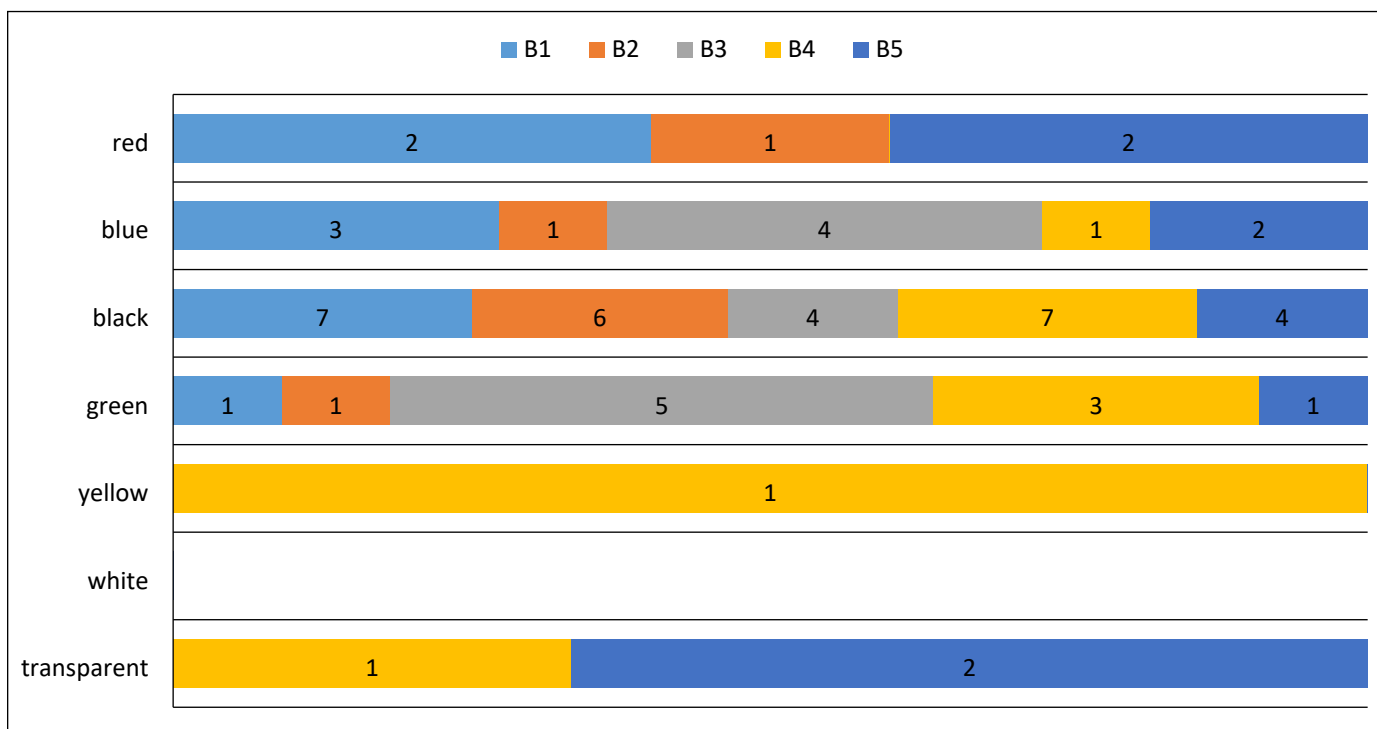

109

110 Figure SI 3: Ratio of MPs colors found in Non-Urban (B1-B5) Water stations of SR. Data is plotted as numeric abundance of colors  
 111 against Non-Urban stations. The denotations B1, B2, B3, B4 and B5) represents Kalam, Mankial, Bahrain, Madyan and Baghderai  
 112 sampling stations respectively. Numbers 1, 2, 3 etc. in main graph is numeric abundance of colored MPs items observed on optical  
 113 microscopy.

114

115

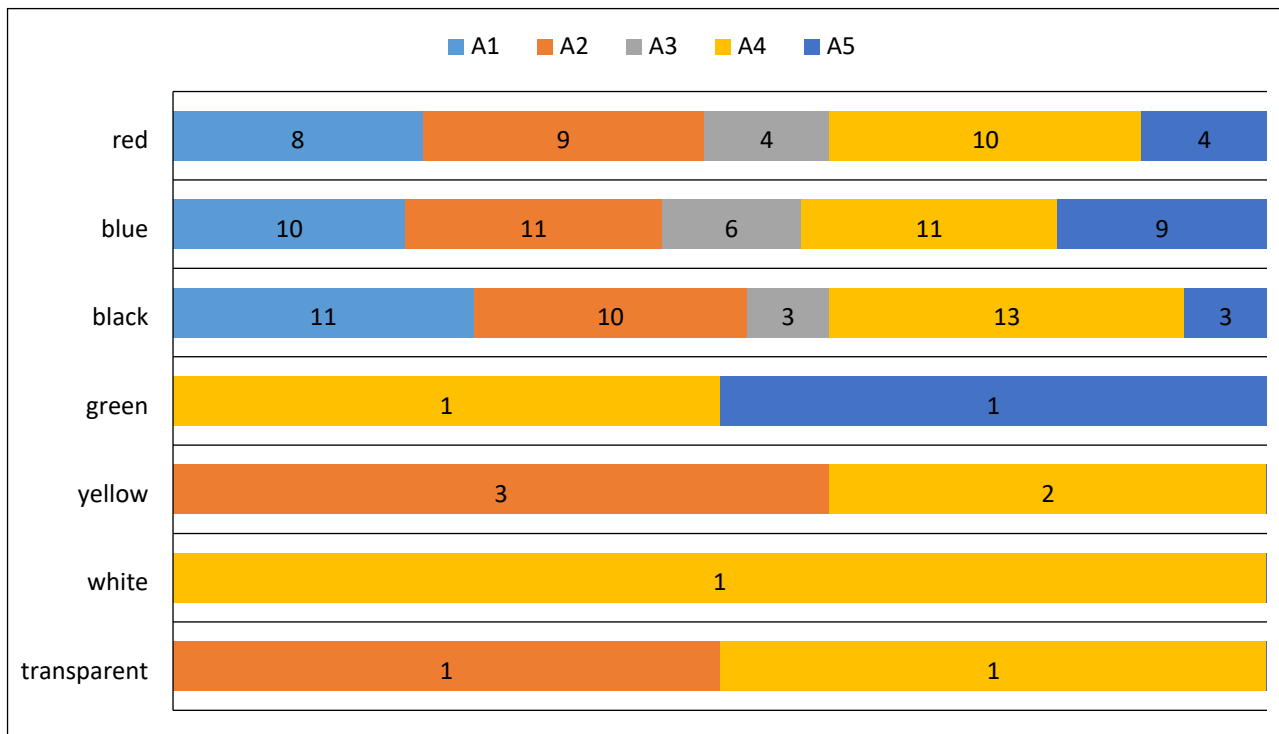

118 Figure SI 4: Ratio of MPs colors found in Urban Water (A1-A5) stations of SR. Data is plotted as numeric abundance of colors  
 119 against urban stations. The denotations A1, A2, A3, A4 and A5 represents sampling stations Matta , Kanju , Hazara, Gugdara and  
 120 Chakdara respectively. Numbers 1, 2, 3 etc. in main graph is numeric abundance of colored MPs items observed on optical  
 121 microscopy.

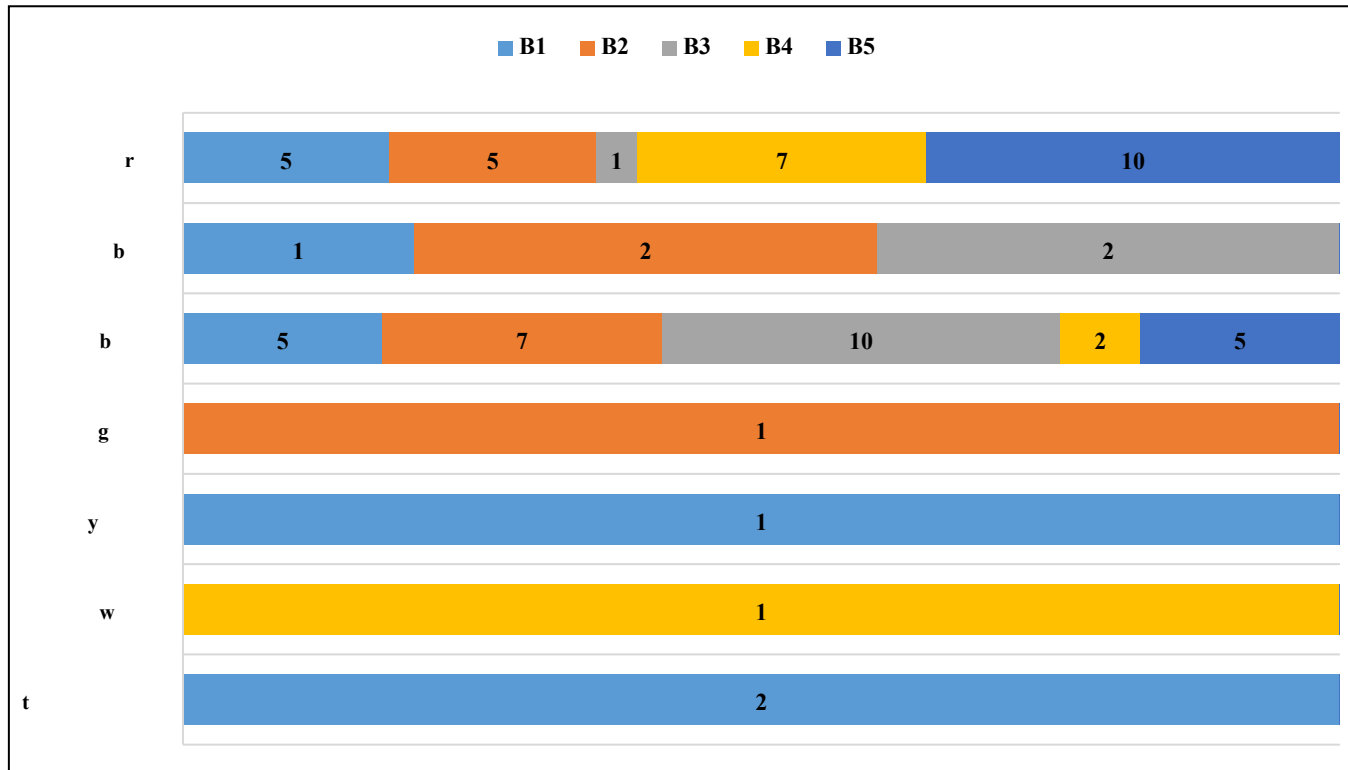

122

123

124

125 Figure SI.5: Ratio of MPs colors found in Non-Urban (B1-B5) fish. Data is plotted as numeric abundance of colors against Non-  
 126 Urban fish. The denotations B1, B2, B3, B4 and B5) represents Kalam, Mankial, Bahrain, Madyan and Baghderai sampling stations  
 127 respectively. Numbers 1, 2, 3 etc. in main graph is numeric abundance of colored MPs items observed on optical microscopy.

128

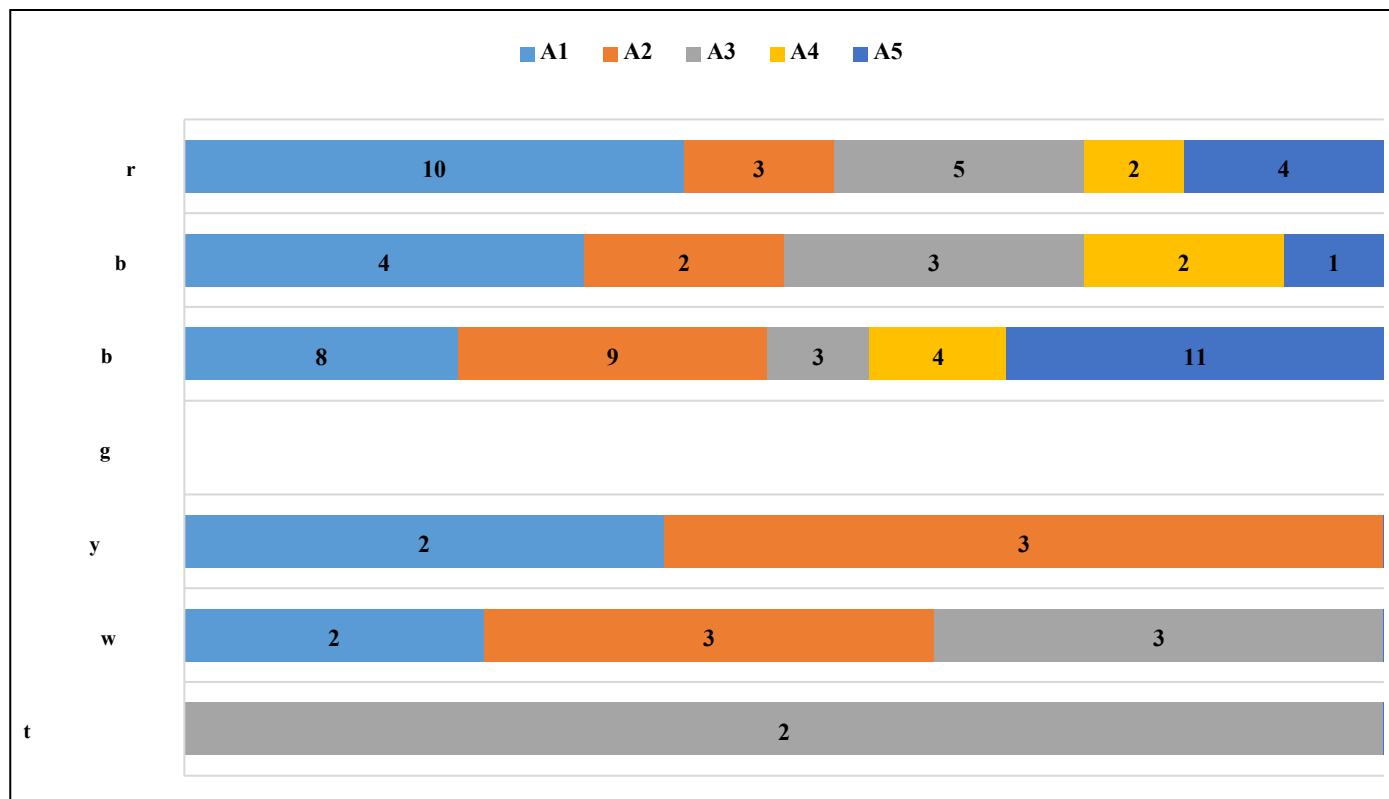

130

131

132

133 Figure SI 6: Ratio of MPs colors found in Urban (A1-A5) fish. Data is plotted as numeric abundance of colors against urban fish.  
 134 The denotations A1, A2, A3, A4 and A5 represents sampling stations Matta , Kanju , Hazara, Gugdara and Chakdara respectively.  
 135 Numbers 1, 2, 3 etc. in main graph is numeric abundance of colored MPs items observed on optical microscopy.

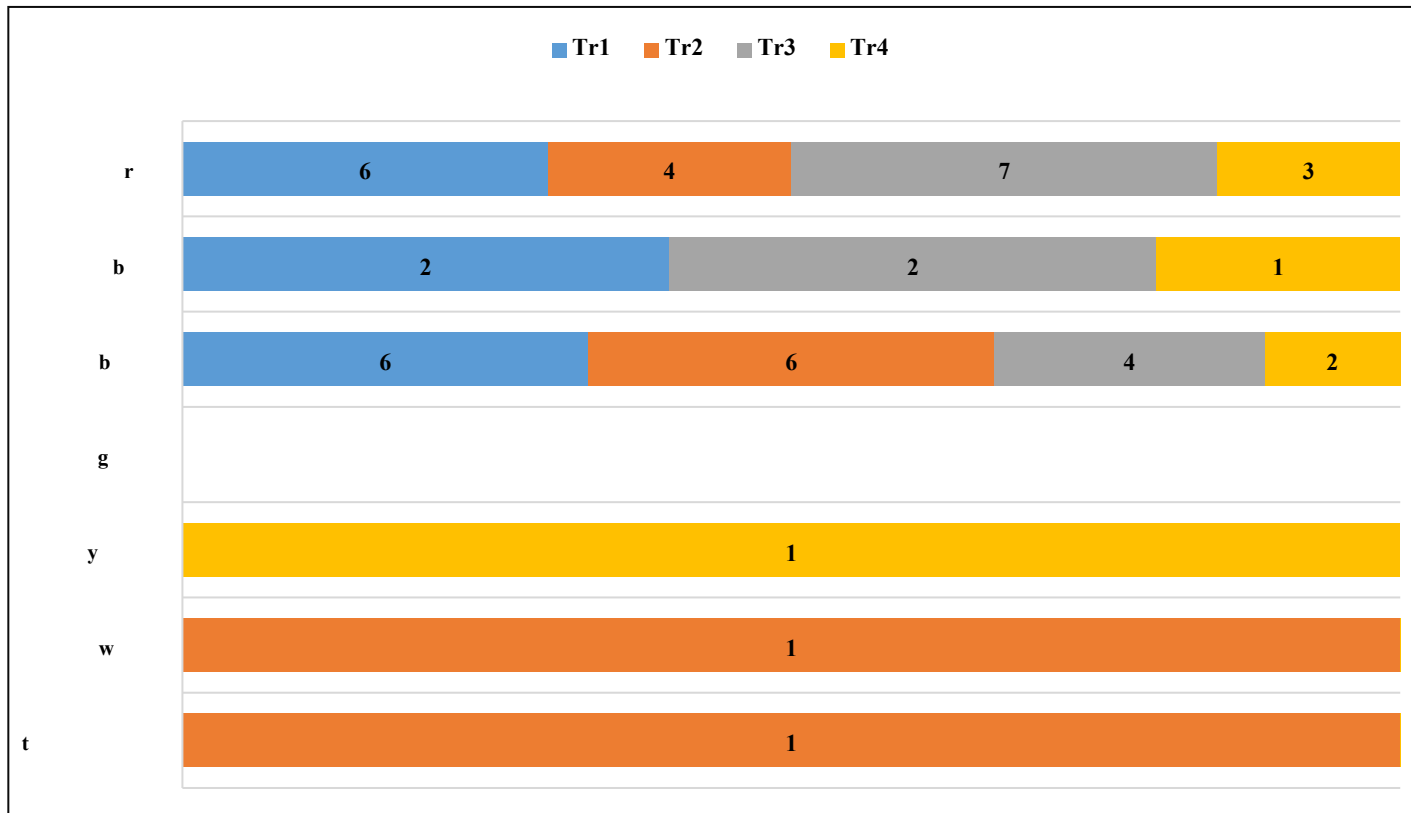

136

137

138 Figure SI 7: Ratio of MPs colors found in Sediment of Non-Urban (Tr1-Tr4) tributaries. Data is plotted as numeric abundance of  
 139 colors against Non-Urban tributaries. The denotations Tr1, Tr2, Tr3 and Tr4 represents Mankial, Bahrain and Madyan sampling  
 140 sites respectively. Numbers 1, 2, 3 etc. in main graph is numeric abundance of colored MPs items observed on optical microscopy.

141



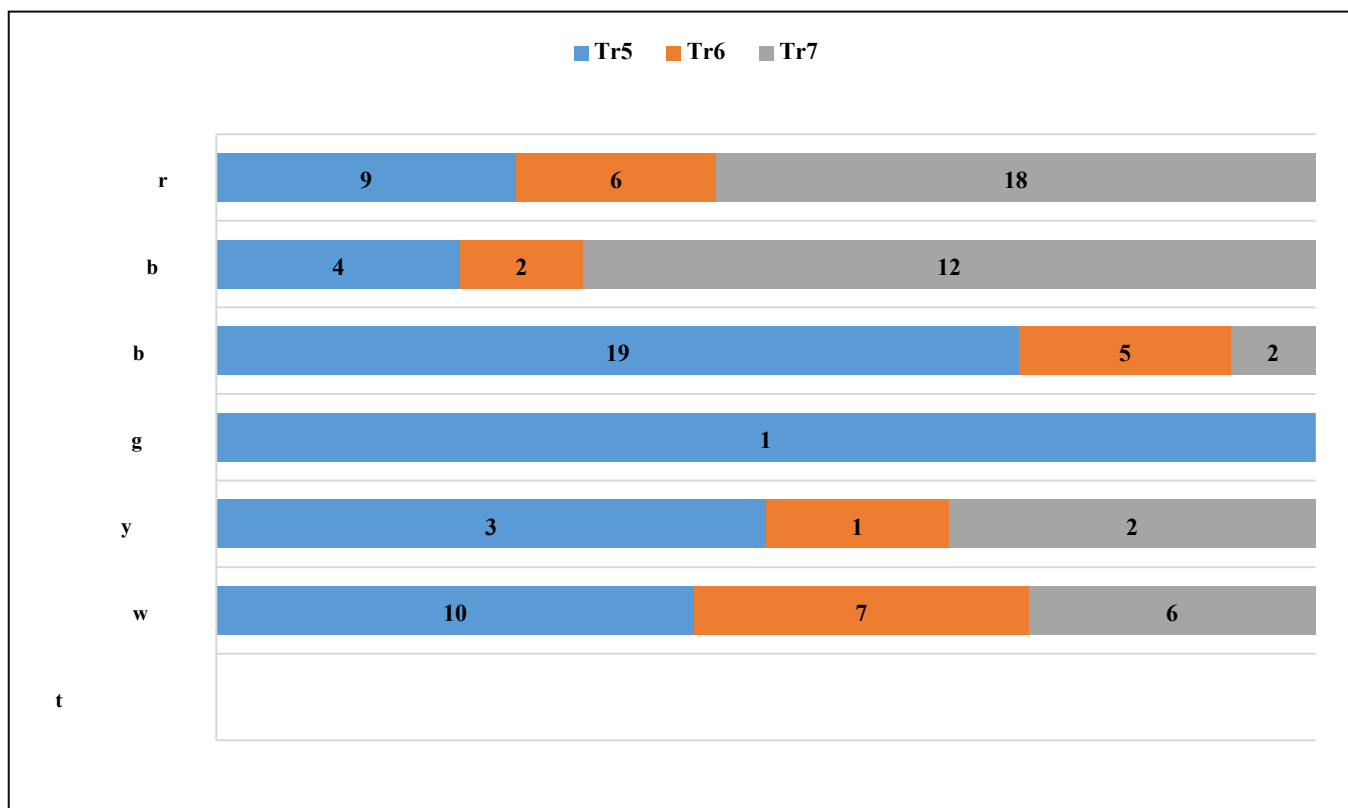

143

144 Figure SI 8: Ratio of MPs colors found in Sediment of Urban (Tr5-Tr7) tributaries. Data is plotted as numeric abundance of  
 145 colors against urban tributaries. The denotations Tr5, Tr6 and Tr7 represents Matta, Hazara and Gugdara sampling sites  
 146 respectively. Numbers 1, 2, 3 etc. in main graph is numeric abundance of colored MPs items observed on optical microscopy.  
 147

148

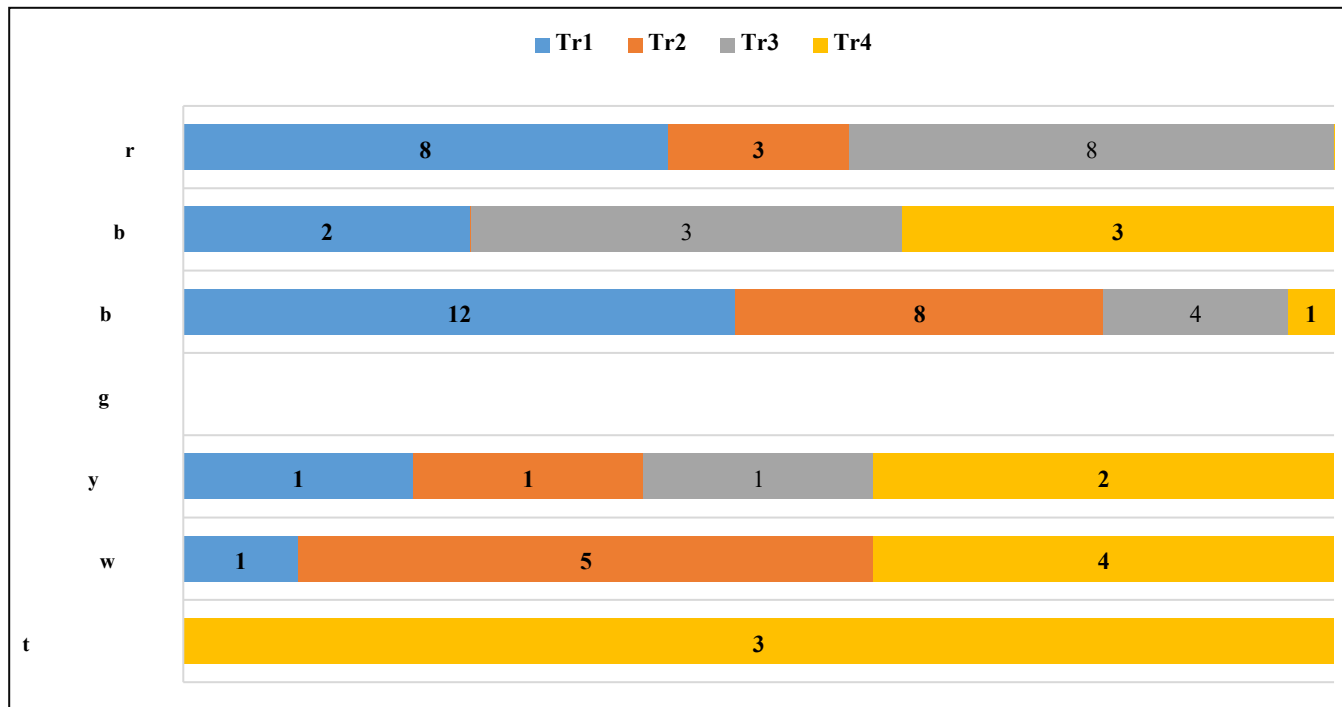

149

150

151 Figure SI 9: Ratio of MPs colors found in Water of Non-Urban (Tr1-Tr4) tributaries. Data is plotted as numeric abundance of colors  
 152 against Non-Urban tributaries. The denotations Tr1, Tr2, Tr3 and Tr4 represents Mankial , Bahrain and Madyan sampling sites  
 153 respectively. Numbers 1, 2, 3 etc. in main graph is numeric abundance of colored MPs items observed on optical microscopy.

154

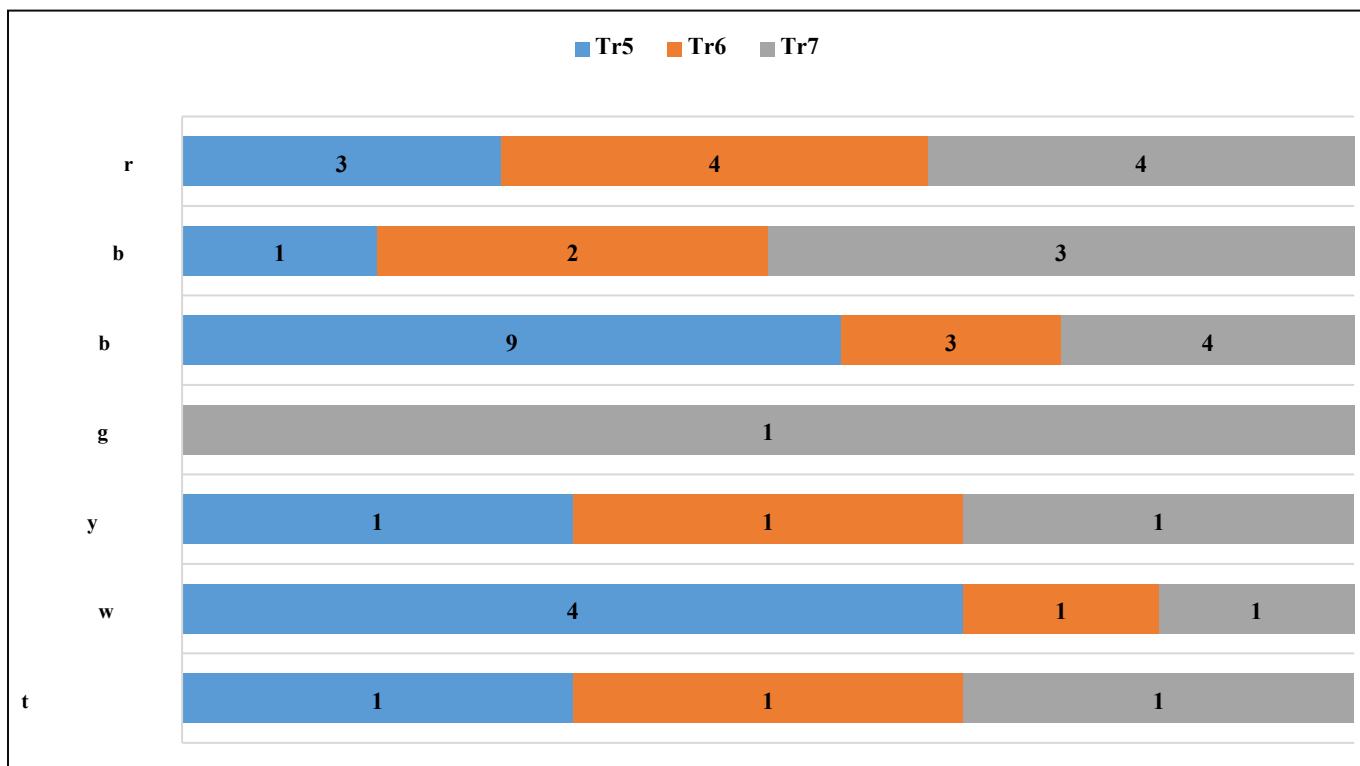

156

157

158 Figure SI 10: Ratio of MPs colors found in Water of Urban (Tr5-Tr7) tributaries. Data is plotted as numeric abundance of colors  
 159 against urban tributaries. The denotations Tr5, Tr6 and Tr7 represents Matta, Hazara and Gugdara sampling sites respectively.  
 160 Numbers 1, 2, 3 etc. in main graph is numeric abundance of colored MPs items observed on optical microscopy.

161

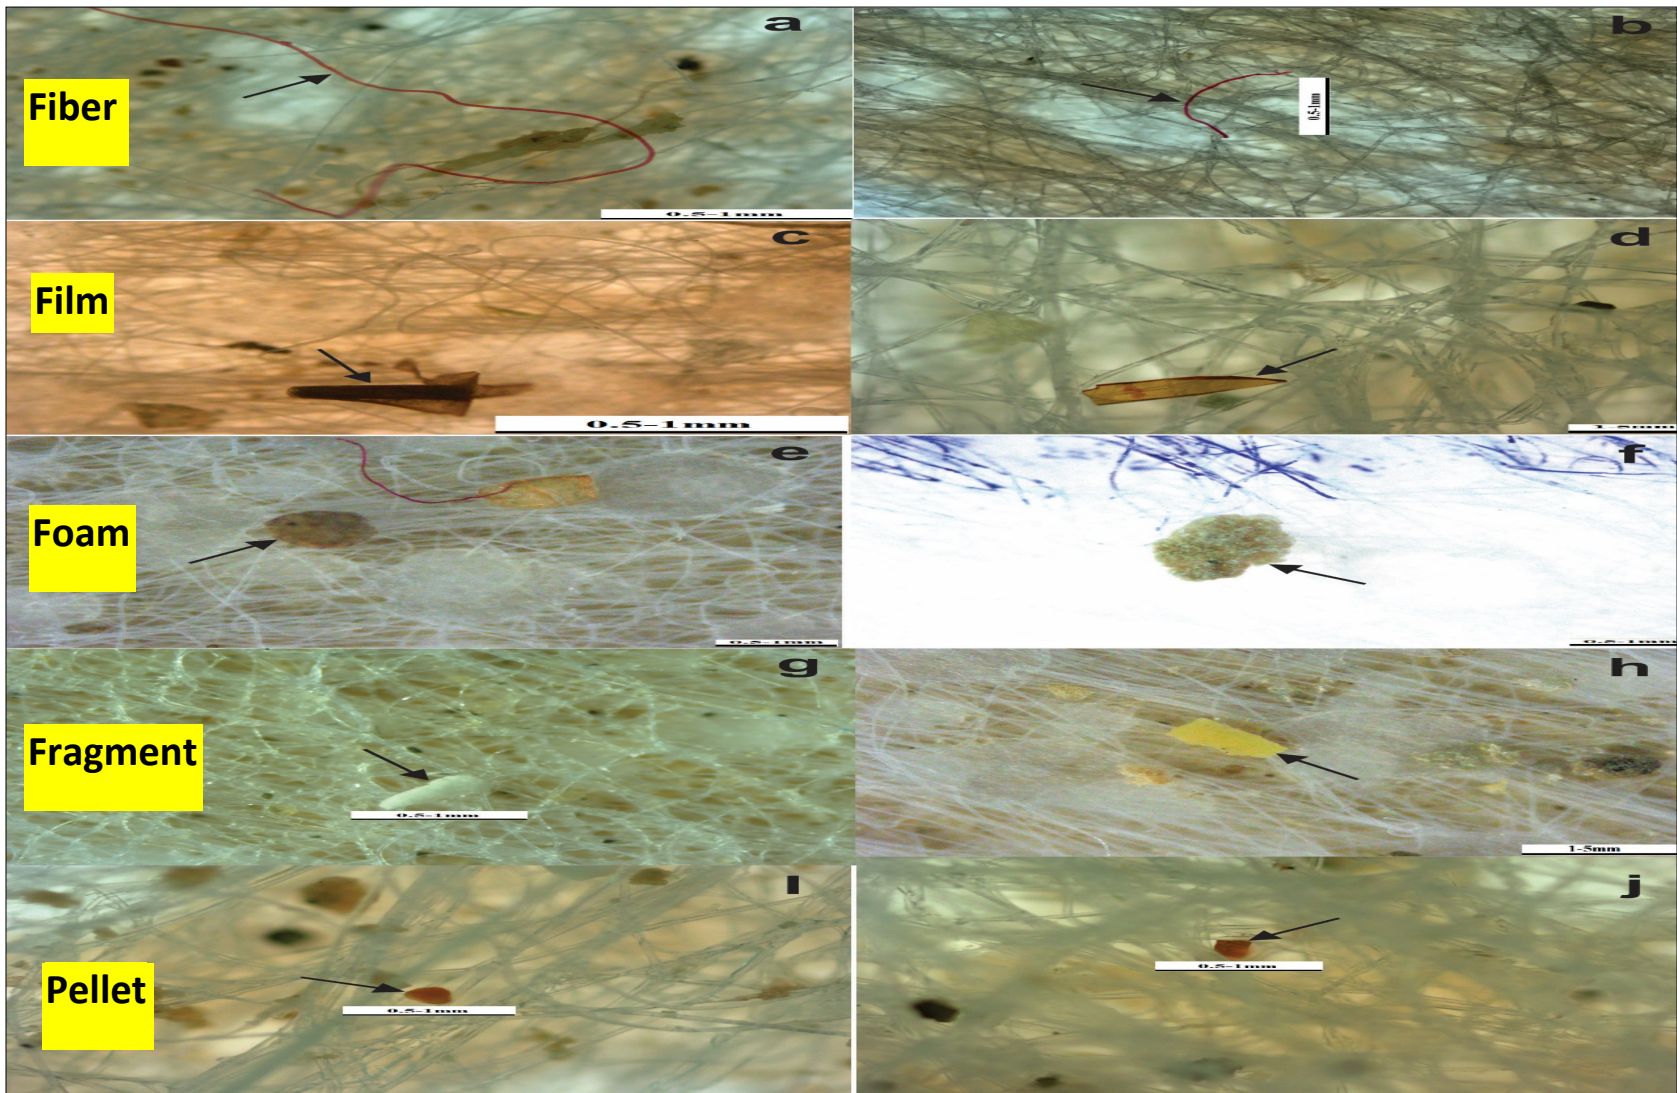

162

163 Figure SI 11: Optical microscope images of selected MPs items on filter paper observed in sediment, water and fish samples. Arrows

164 shows MPs items with scale bar in millimeter (mm). These images of suspected MPs were edited using Aphelion Dev. 4.0 software.
